# Supplementary material for: Peptidoglycan Endopeptidase from Novel Adaiavirus Bacteriophage Lyses Pseudomonas aeruginosa Strains as Well as Arthrobacter globiformis and A. pascens Bacteria
Source: MDPI journal article supplement (doi:10.3390/microorganisms11081888), 2023-07-26
Supplement: s1 [file s1]

## Supplementary material

**Supplementary Table S1.** Annotation of Pseudomonas virus Hadban genes.

| ORF | start | end   | The best similar protein                                                  | E-value   | Aa similarity with Adaia |
|-----|-------|-------|---------------------------------------------------------------------------|-----------|--------------------------|
| 1   | 87    | 428   | hypothetical protein PBI_ATRAXA_1 [Arthrobacter phage Atraxa]             | 4.9e-50   | 93.9                     |
| 2   | 421   | 654   | hypothetical protein PBI_ADAIA_2 [Arthrobacter phage Adaia]               | 2.70E-54  | 97.4                     |
| 3   | 651   | 2057  | COG4626 phage terminase, large subunit [uncultured Caudovirales phage]    | 3.10E-168 | 99.2                     |
| 4   | 2069  | 3190  | portal protein [Siphoviridae sp.]                                         | 2.90E-122 | 98.1                     |
| 5   | 3183  | 4796  | major capsid and protease fusion protein [Gordonia phage Schiebs]         | 1.60E-152 | 98.3                     |
| 6   | 4861  | 5205  | head-to-tail adaptor [Gordonia phage Coeur]                               | 4.4E-39   | 93.6                     |
| 7   | 5205  | 5588  | hypothetical protein PBI_ADAIA_7 [Arthrobacter phage Adaia]               | 1.10E-73  | 99.2                     |
| 8   | 5592  | 6017  | tail tube protein family protein [Bacteriophage sp.]                      | 6.60E-49  | 95.1                     |
| 9   | 6020  | 6409  | putative tail component                                                   | 2.00E-51  | 100                      |
| 10  | 6423  | 6716  | tail assembly chaperone [Arthrobacter phage Adaia]                        | 1.80E-34  | 100                      |
| 11  | 6734  | 6856  | tail assembly chaperone [Arthrobacter phage Adaia]                        | 1.70E-31  | 100                      |
| 12  | 6857  | 8773  | tape measure protein [Arthrobacter phage Adaia]                           | 4.60E-214 | 99.8                     |
| 13  | 8773  | 10035 | minor tail protein [Arthrobacter phage Atraxa]                            | 8.70E-162 | 99.0                     |
| 14  | 10035 | 11648 | minor tail protein [Arthrobacter phage Adaia]                             | 7.30E-196 | 76.6                     |
| 15  | 11645 | 11791 | hypothetical protein SEA_PRAIRIE_33 [Arthrobacter phage Prairie]          | 4.20E-21  | -                        |
| 16  | 11775 | 12440 | lysine A [Arthrobacter phage Adaia]                                       | 3.40E-60  | 96.4                     |
| 17  | 12451 | 12678 | hypothetical protein PBI_ATRAXA_16 [Arthrobacter phage Atraxa]            | 2.80E-32  | 100                      |
| 18  | 12668 | 12970 | hypothetical protein PBI_ATRAXA_17 [Arthrobacter phage Atraxa]            | 9.10E-57  | 99                       |
| 19  | 13015 | 13200 | hypothetical protein PBI_ADAIA_18 [Arthrobacter phage Adaia]              | 9.00E-44  | 98.4                     |
| 20  | 13235 | 13468 | hypothetical protein PBI_ADAIA_19 [Arthrobacter phage Adaia]              | 6.10E-51  | 76.9                     |
| 21  | 13465 | 13683 | hypothetical protein PBI_ADAIA_20 [Arthrobacter phage Adaia]              | 8.70E-49  | 100                      |
| 22  | 13680 | 13865 | hypothetical protein PBI_ADAIA_21 [Arthrobacter phage Adaia]              | 4.60E-42  | 98.4                     |
| 23  | 13862 | 14365 | nothing, but aa 1-61 identical with Arthrobacter JUb119 MCS3494086        |           |                          |
| 24  | 14426 | 14632 | nothing, but 27/68 aa identical with hypothetical protein of Arthrobacter |           |                          |
| 25  | 14635 | 14823 | hypothetical protein PBI_ADAIA_24 [Arthrobacter phage Adaia]              | 4.50E-44  | 88.9                     |
| 26  | 14813 | 15031 | hypothetical protein PBI_ADAIA_25 [Arthrobacter phage Adaia]              | 1.20E-30  | 48.5                     |
| 27  | 15859 | 16149 | hypothetical protein PBI_ADAIA_27 [Arthrobacter phage Adaia]              | 5.20E-55  | 80.0                     |
| 28  | 16184 | 16429 | HNH endonuclease [Siphoviridae sp.]                                       | 2.10E-28  | 98.8                     |
